# Supplementary material for: TMPRSS13 zymogen activation, surface localization, and shedding is regulated by proteolytic cleavage within the non-catalytic stem region
Source: publisher site journal article supplement (doi:10.1515/hsz-2022-0129), 2022-07-07
Supplement: Supplementary file 1 [file j_hsz-2022-0129_suppl.pdf]

## TMPRSS13 zymogen activation, surface localization, and shedding is regulated by proteolytic cleavage within the non-catalytic stem region

Carly E. Martin, Andrew S. Murray, Jacob R. Mackinder, Kimberley E. Sala-Hamrick, Michael G. Flynn, Joseph G. Lundgren, Fausto A. Varela and Karin List

### Supplementary material

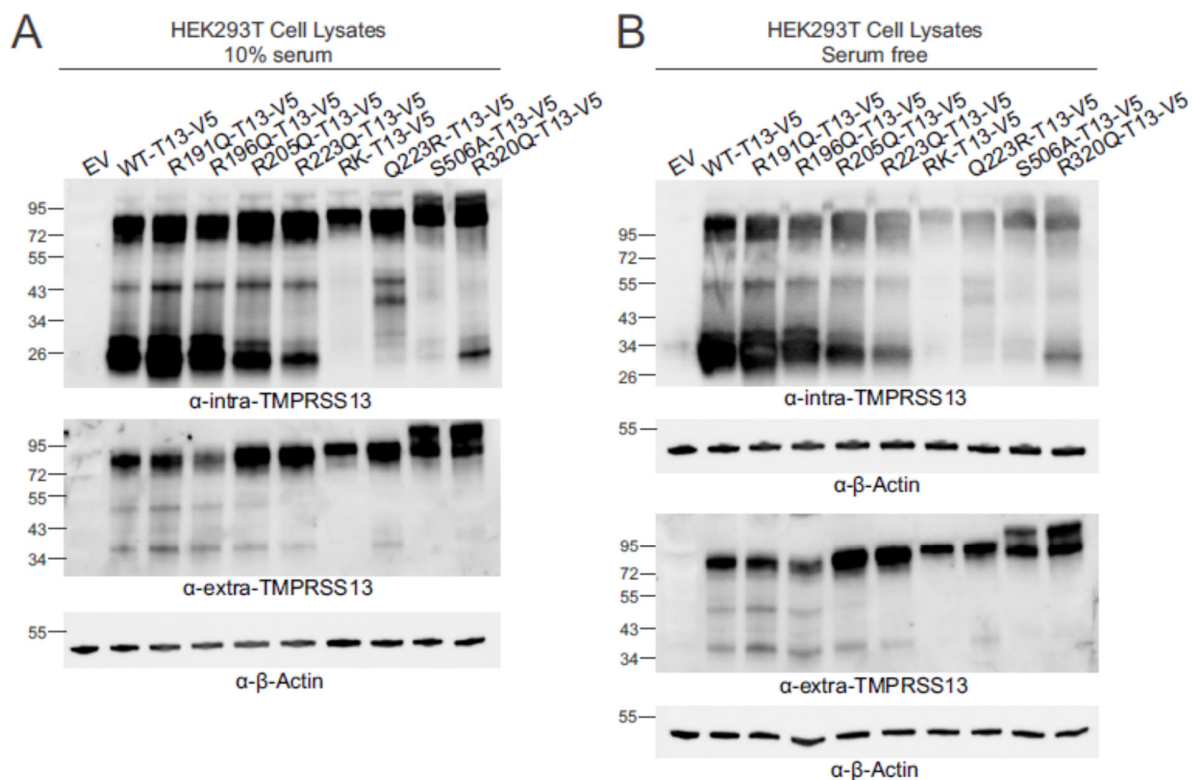

**Supplementary Figure S1.** HEK293T cells were transfected with empty vector (EV), WT-TMPRSS13 (T13)-V5, S506A-T13-V5, R320Q-T13-V5, R191Q-T13-V5, R196Q-T13-V5, R205Q-T13-V5, R223Q-T13-V5, RK-T13-V5 and Q223R-T13-V5. Transfected cells were either (A) grown in media containing 10% serum for 48 hours or (B) washed and serum-starved 24 hours post-transfection and collected the following day. Lysates were harvested and proteins were separated by SDS-PAGE under reducing conditions on 10% gels and analyzed by western blotting. Proteins were detected using anti-intra-TMPRSS13, anti-extra-TMPRSS13, or anti-beta-actin antibodies as indicated.

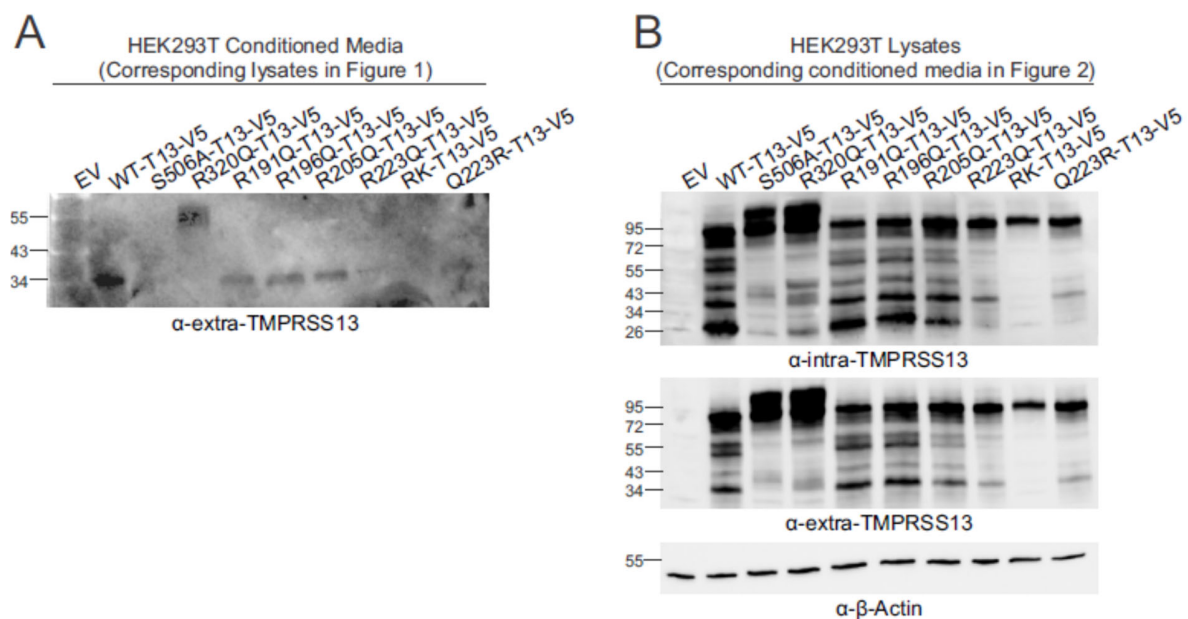

**Supplementary Figure S2.** HEK293T cells were transfected with empty vector (EV), WT-TMPRSS13 (T13)-V5, S506A-T13-V5, R320Q-T13-V5, R191Q-T13-V5, R196Q-T13-V5, R205Q-T13-V5, R223Q-T13-V5, RK-T13-V5 and Q223R-T13-V5. (A) Corresponding conditioned media samples shown in Figure 1 were harvested and proteins were separated by SDS-PAGE under reducing conditions on a 10% gel and analyzed by western blotting. Proteins were detected using anti-extra-TMPRSS13 antibody. (B) Corresponding cell lysate samples shown in Figure 2. Proteins in lysates were separated by SDS-PAGE under reducing conditions on a 4-15% gel and analyzed by western blotting. Proteins were detected using anti-intra-TMPRSS13, anti-extra-TMPRSS13, or anti-beta-actin antibodies.

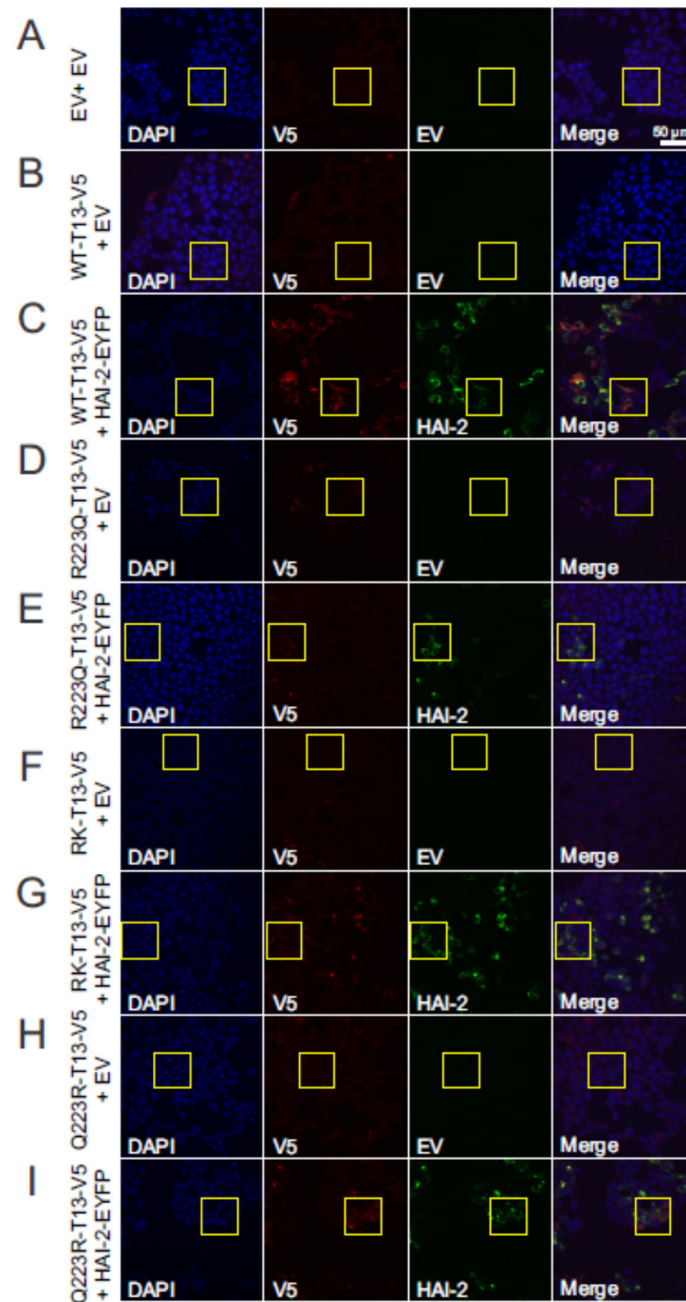

**Supplementary Figure S3.** Representative uncropped images from Figure 5. HEK293T cells were plated onto glass coverslips and 24 hours after plating were transfected for 48 hours with (A) EV + EV, (B) WT-T13-V5 + EV, (C) WT-T13-V5 + HAI-2-EYFP, (D) R223Q-T13-V5 + EV, (E) R223Q-T13-V5 + HAI-2-EYFP, (F) RK-T13-V5 + EV, (G) RK-T13-V5 + HAI-2-EYFP, (H) Q223R-T13-V5 + EV, (I) Q223R-T13-V5 + HAI-2-EYFP. Cells were fixed onto coverslips and incubated with anti-V5 to detect TMPRSS13. Coverslips were mounted to slides with DAPI-containing mounting media to detect nuclei. Nuclei=blue, panels A-I. TMPRSS13-V5=red, panels A-I. HAI-2-EYFP=green, panels C, E, G, and I. Merged images are shown in panels on the right. Scale bar measures 50 μm. Yellow boxes indicate cropped areas shown in Figure 5.

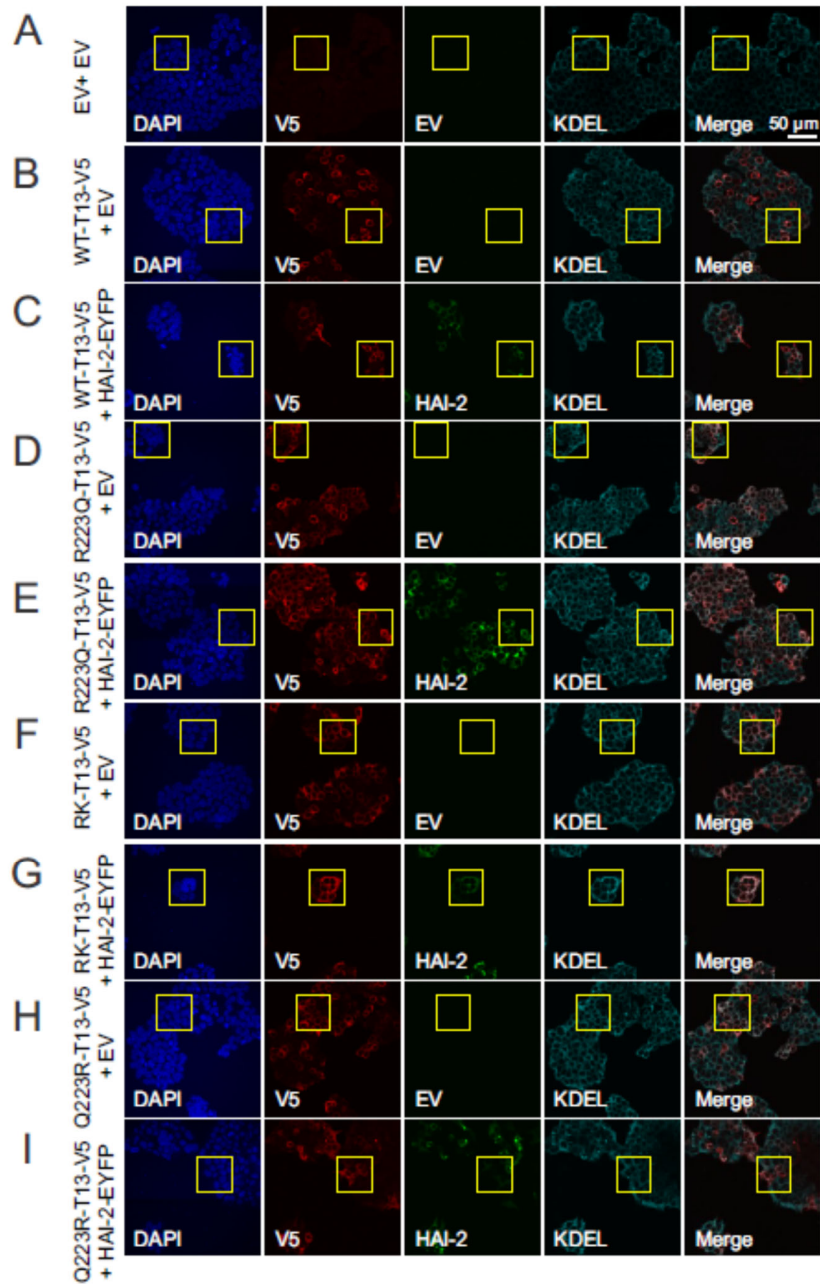

**Supplementary Figure S4.** Representative uncropped images from Figure 6. HEK293T cells were plated onto glass coverslips and 24 hours after plating were transfected for 48 hours with (A) EV + EV, (B) WT-T13-V5 + EV, (C) WT-T13-V5 + HAI-2-EYFP, (D) R223Q-T13-V5 + EV, (E) R223Q-T13-V5 + HAI-2-EYFP, (F) RK-T13-V5 + EV, (G) RK-T13-V5 + HAI-2-EYFP, (H) Q223R-T13-V5 + EV, (I) Q223R-T13-V5 + HAI-2-EYFP. Cells were fixed onto coverslips, permeabilized, and incubated with anti-V5 to detect TMPRSS13 and anti-KDEL to detect the endoplasmic reticulum (ER). Coverslips were mounted to slides with DAPI-containing mounting media to detect nuclei. Nuclei=blue, panels A-I. TMPRSS13-V5=red, panels A-I. HAI-2-EYFP=green, panels C, E, G, and I. ER (KDEL)=cyan, panels A-I. Merged images of TMPRSS13/KDEL are shown in panels on the right. Scale bar measures 50  $\mu$ m. Yellow boxes indicate cropped areas shown in Figure 6.
